# Supplementary material
Source: publisher site journal article supplement (https://www.spandidos-publications.com/2026/downloadSupplementary)

Figure S1. Subcellular localization of Dm-dNK in MDA-MB-231 and MDA-MB-231R cells. Fluorescence microscopy of cells transfected with dNK-GFP and dNKmut-GFP. Wild-type dNK-GFP was located in the nucleus, whereas dNKmut was located in the cytosol in the MDA-MB-231 or MDA-MB-231R cells. dNK, deoxyribonucleoside kinase; dNKmut, dNK mutant; GFP, green fluorescent protein.

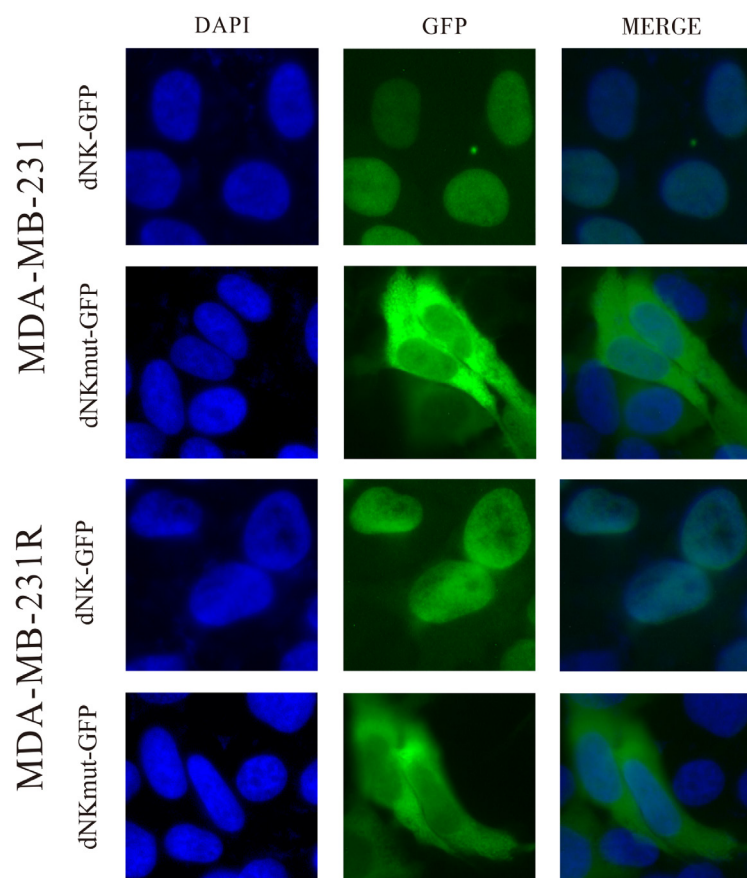

Supplement: Supplementary file 1 [file downloadSupplementary]
